# Supplementary material for: A Synergy between Controlled Salinity Brine and Biosurfactant Flooding for Improved Oil Recovery: An Experimental Investigation Based on Zeta Potential and Interfacial Tension Measurements
Source: Hindawi journal article supplement (doi:10.1155/2019/2495614), 2019-07-04
Supplement: f1 [file 2495614.f1.docx]

**Supplementary Materials**

Table 1 presents the results of the zeta potential measurements. The single phase is the measured zeta potential when the core pores were saturated with 100% formation brine (FMB) without any oil. The FMB measurement is two phase zeta potential measurement at residual oil saturation after flooding the core with formation brine. The measured zeta potential at residual oil saturation during flooding with controlled salinity brine (CSB) is represented by “CSB” in the table, while the measured zeta potential with the use of combined controlled salinity biosurfactant flooding using rhamnolipid (CSBS-R) and greenzyme (CSBS-G) are presented as “CSBS-R” and “CSBS-G” respectively. Both measurements were carried out as residual oil saturation.

The measured values of oil-brine interfacial tension are presented in Table 2. The same crude oil was used for all the measurements and the same concentration of biosurfactants (1%) was added to all brine solutions. Three brine solutions with different ionic strength were used and the measured IFT using these brine solutions are presented as “no biosurfactant”. The measured IFT when greenzyme and rhamnolipid were added to these brine solutions are referenced “greenzyme” and “rhamnolipid” respectively.

Finally, Table 3 presents supplementary data from core flooding experiments. The quantity of the oil initially in place (OIIP), initial water saturation (Swi) and oil initial oil (Soi) were determined and calculated from volume of water produced during oil injection into the core plugs. While the residual oil saturation (Soi) was calculated from the volume of oil produced from each of the flooding. All of these properties were measured and calculated for each of the core samples as summarised in the table. The identity of the brine solution used for each flooding experiment is described by the brine sample.

Table 1: Zeta potential measurements.

| **Samples** | **Zeta potential (mV)** |
| --- | --- |
| Single phase | 7.13 |
| FMB | 4.27 |
| CSB | -14.47 |
| CSBS-R | -27.83 |
| CSBS-G | -48.57 |

Table 2: Interfacial tension (IFT) measurements.

| **Ionic strength (M)** | **Greenzyme (mN/m)** | **Rhamnolipid (mN/m)** | **No Biosurfactant (mN/m)** |
| --- | --- | --- | --- |
| 0.0083 | 3.40 | 0.11 | 15.56 |
| 0.7500 | 2.72 | 0.21 | 17.30 |
| 3.000 | 2.50 | 0.34 | 18.36 |

Table 3: Core flooding results.

| **Brine samples:** | **FMB** | **CSB** | **CSBS-G** | **CSBS-R** |
| --- | --- | --- | --- | --- |
| **Core samples:** | **C30** | **C27** | **C13** | **C16** |
| OIIP (ml) | 15.00 | 14.60 | 14.50 | 15.5 |
| Swi | 0.31 | 0.39 | 0.43 | 0.42 |
| Soi | 0.69 | 0.61 | 0.57 | 0.58 |
| Sor | 0.32 | 0.23 | 0.17 | 0.19 |
